# Supplementary material for: Influence of mobile ions on the electroluminescence characteristics of methylammonium lead iodide perovskite diodes
Source: Royal Society of Chemistry journal article supplement (doi:10.1039/c6ta06854e), 2016-01-01
Supplement: c6ta06854e1.pdf [file c6ta06854e1.pdf]

Electronic supplementary information

## **Influence of the mobile ions on the electroluminescence of perovskite solar cells**

Enrico Bandiello,<sup>a</sup> Jorge Ávila,<sup>a</sup> Lidón Gil-Escrig,<sup>a</sup> Eelco Tekelenburg,<sup>b</sup> Michele Sessolo<sup>\*a</sup> and Henk J. Bolink<sup>a</sup>

<sup>a</sup> Instituto de Ciencia Molecular, Universidad de Valencia, C/ Catedrático J. Beltrán 2, 46980 Paterna, Spain. \*E-mail: [michele.sessolo@uv.es](mailto:michele.sessolo@uv.es)

<sup>b</sup> Faculty of Mathematics and Natural Sciences, University of Groningen, Nijenborgh 4, 9747 AG, Groningen, The Netherlands.

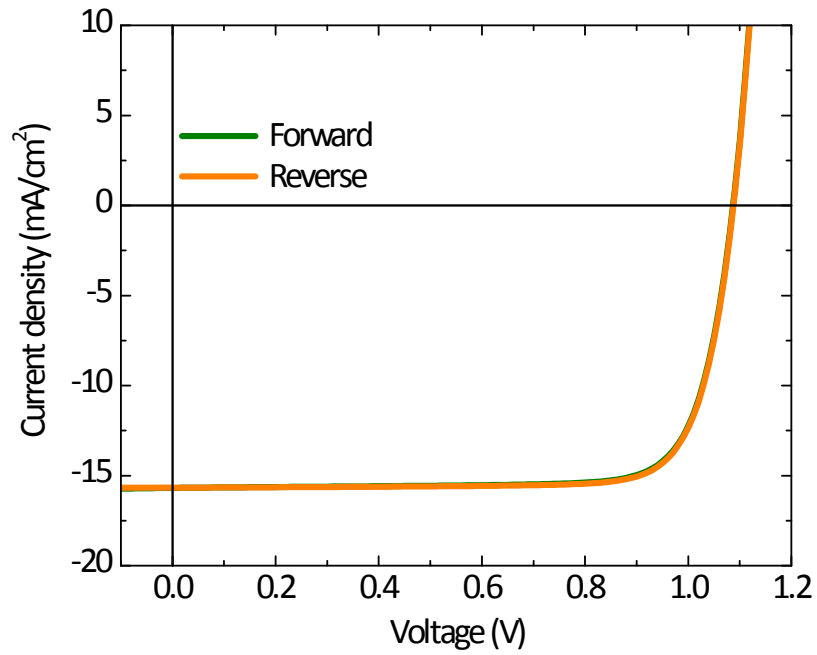

**Fig. S1** Electrical characterization under illumination for a solar cells with the structure ITO/PEDOT:PSS/polyTPD/MAPbI<sub>3</sub>/PCBM/Ba-Ag, where the perovskite absorber thickness is 350 nm. The voltage scan speed is 0.35 V s<sup>-1</sup>, in forward (negative to positive) and in reverse (positive to negative) bias.

|         | $J_{sc}$ (mA cm <sup>-2</sup> ) | $V_{oc}$ (mV) | $FF$ (%) | $PCE$ (%) |
|---------|---------------------------------|---------------|----------|-----------|
| Forward | 15.7                            | 1087          | 79.7     | 13.6      |
| Reverse | 15.7                            | 1088          | 80.2     | 13.7      |

**Table S1.** Photovoltaic parameters of the solar cell reported in Figure S1.

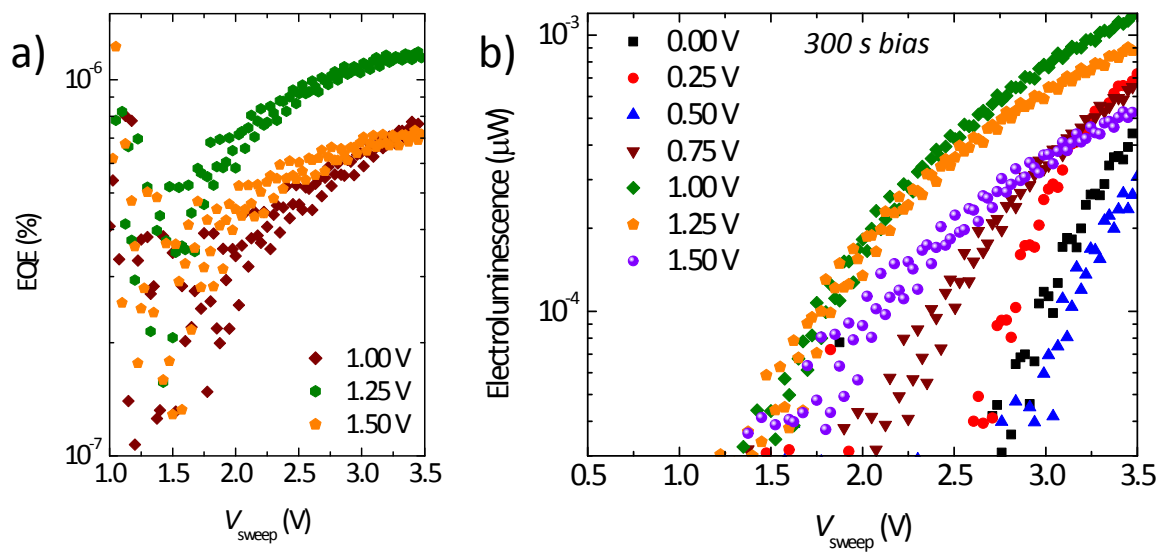

**Fig. S2** (a) EQE and (b) electroluminescence for the non-ohmic device B when biased in dark for 300 s.

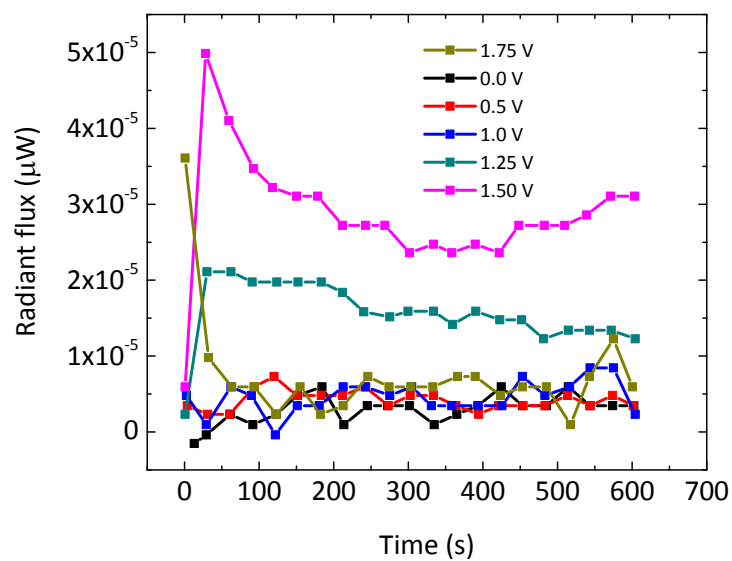

**Fig. S3** DC component of the electroluminescence for the perovskite diode B (single carrier device) for increasing constant driving voltage ( $V_{\text{bias}}$ ).

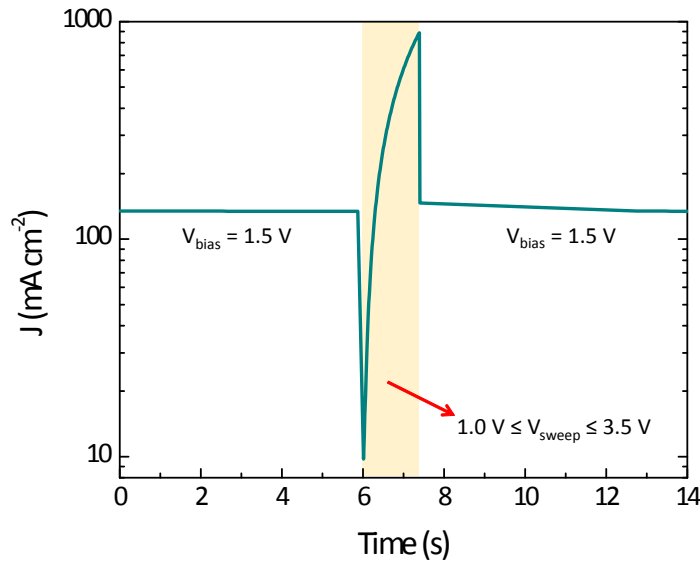

**Fig. S4** Time dependent current density curve showing the recovery of the current density after the fast J-V sweep, for device B.

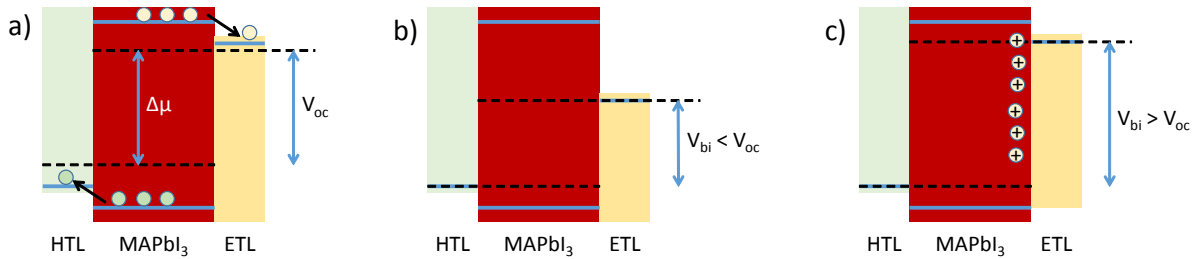

**Fig. S5** (a) Simplified band diagram indicating the maximum attainable  $V_{oc}$  as related to the quasi-Fermi level splitting  $\Delta\mu$ . (b) In a degraded solar cells, an extraction barrier is present at least at one of the interface (here the ETL), reducing the device built-in voltage and causing s-shaped J-V characteristics. (c) Forward biasing the device reduced the barrier for the electron injection (extraction), hence recovering the  $V_{bi}$  and the device FF.
